# Supplementary material
Source: publisher figshare collection journal article supplement (https://karger.figshare.com/articles/dataset/_/11889642)
Supplement: Supplementary file 1 [file 1]

**Table S1** These binding of rs12607853 to miRNAs

| miRNA           | SNP        | Effect | Allele | Score | Energy | Binding                                                                                            |
|-----------------|------------|--------|--------|-------|--------|----------------------------------------------------------------------------------------------------|
| hsa-miR-141-3p  | rs12607853 | break  | C      | 158   | -14.19 | Query: 3' gguAGAAUGGUCU—GUCACAu 5'<br> :    :         <br>Ref: 5' agcTTTTATTGAGTCCAGTGTt 3'        |
|                 |            |        | T      |       |        |                                                                                                    |
| hsa-miR-200a-3p | rs12607853 | break  | C      | 150   | -10.20 | Query: 3' uguAGCAAUGGUCU—GUCACAu 5'<br> :    :         <br>Ref: 5' agcTTTTATTGAGTCCAGTGTt 3'       |
|                 |            |        | T      |       |        |                                                                                                    |
| hsa-miR-3654    | rs12607853 | break  | C      | 144   | -12.34 | Query: 3' aaGGAGUCGA—ACAGGUCAg 5'<br>:: : :         <br>Ref: 5' ctTTTTATTGAGTCCAGTg 3'             |
|                 |            |        | T      |       |        |                                                                                                    |
| hsa-miR-378a-3p | rs12607853 | break  | C      | 157   | -20.17 | Query: 3' ggAAGACUGAGGUUCAGGUca 5'<br>  :     ::       <br>Ref: 5' gcTTTTTA—TTGAGTCCAGt 3'         |
|                 |            |        | T      |       |        |                                                                                                    |
| hsa-miR-378b    | rs12607853 | break  | C      | 149   | -15.22 | Query: 3' aaGACGGAGGUUCAGGUca 5'<br>:  :  ::       <br>Ref: 5' ctTTTTATTGAGTCCAGt 3'               |
|                 |            |        | T      |       |        |                                                                                                    |
| hsa-miR-378c    | rs12607853 | break  | C      | 162   | -20.20 | Query: 3' ggugaGAAGACUGAGGUUCAGGUca 5'<br>   :     ::       <br>Ref: 5' aaaagCTTTTA—TTGAGTCCAGt 3' |
|                 |            |        | T      |       |        |                                                                                                    |
| hsa-miR-378d    | rs12607853 | break  | C      | 152   | -15.76 | Query: 3' aaAGACUGAGGUUCAGGUca 5'<br> :     ::       <br>Ref: 5' ctTTTTA—TTGAGTCCAGt 3'            |
|                 |            |        | T      |       |        |                                                                                                    |
| hsa-miR-378e    | rs12607853 | break  | C      | 148   | -15.30 | Query: 3' aggacugAGGUUCAGGUca 5'<br> ::       <br>Ref: 5' ctttttaTTTGAGTCCAGt 3'                   |
|                 |            |        | T      |       |        |                                                                                                    |
| hsa-miR-378f    | rs12607853 | break  | C      | 150   | -19.97 | Query: 3' gaAGACCGAGGUUCAGGUca 5'<br> :     ::       <br>Ref: 5' gcTTTTATTGAGTCCAGt 3'             |
|                 |            |        | T      |       |        |                                                                                                    |
| hsa-miR-378h    | rs12607853 | break  | C      | 148   | -15.88 | Query: 3' gguAGACUGUGGUUCAGGUca 5'<br> :     ::       <br>Ref: 5' gctTTTTAT—TTGAGTCCAGt 3'         |
|                 |            |        | T      |       |        |                                                                                                    |
| hsa-miR-378i    | rs12607853 | break  | C      | 153   | -20.05 | Query: 3' ggAAGACUGAGGAUCAGGUca 5'<br>  :     ::       <br>Ref: 5' gcTTTTTA—TTGAGTCCAGt 3'         |
|                 |            |        | T      |       |        |                                                                                                    |
| hsa-miR-422a    | rs12607853 | break  | C      | 162   | -24.75 | Query: 3' cgGAAGACUGGGAUCAGGUca 5'<br>   :     ::       <br>Ref: 5' agCTTTTA—TTGAGTCCAGt 3'        |

|                 |            |          | T    |     |        |        |                            |    |
|-----------------|------------|----------|------|-----|--------|--------|----------------------------|----|
| hsa-miR-4704-5p | rs12607853 | create   | C    |     |        |        |                            |    |
|                 |            |          | T    | 152 | -15.00 | Query: | 3' uuAGUGAGUGUACGGAUCACAg  | 5' |
|                 |            |          |      |     |        |        | : : :     :                |    |
|                 |            |          | Ref: |     |        | 5'     | ttTTATTtG-A-GTCTAGTGTt     | 3' |
| hsa-miR-4775    | rs12607853 | decrease | C    | 143 | -6.64  | Query: | 3' ucaCUGGCUUUGUUUUUAAUu   | 5' |
|                 |            |          |      |     |        |        | : :                        |    |
|                 |            |          | Ref: |     |        | 5'     | tgaGTCCAGTGTTTAAATTAa      | 3' |
|                 |            |          | T    | 142 | -6.81  | Query: | 3' ucACU-GGCUU-UGUUUUUAAUu | 5' |
|                 |            |          |      |     |        |        | :    : :                   |    |
|                 |            |          | Ref: |     |        | 5'     | ttTGAGTCTAGTGTTTAAATTAa    | 3' |
| hsa-miR-590-3p  | rs12607853 | enhance  | C    | 145 | -5.65  | Query: | 3' ugaucgaaUAUGUAUUUAAUu   | 5' |
|                 |            |          |      |     |        |        | : :                        |    |
|                 |            |          | Ref: |     |        | 5'     | tgagtccaGTGTTTAAAAATTa     | 3' |
|                 |            |          | T    | 153 | -8.78  | Query: | 3' ugaUC-GAAUAUGUAUUUAAUu  | 5' |
|                 |            |          |      |     |        |        | :   :                      |    |
|                 |            |          | Ref: |     |        | 5'     | ttgAGTCTAGTGTTTAAAAATTa    | 3' |
