# Supplementary material
Source: publisher figshare collection journal article supplement (https://karger.figshare.com/articles/dataset/_/11889642)
Supplement: Supplementary file 2 [file 1]

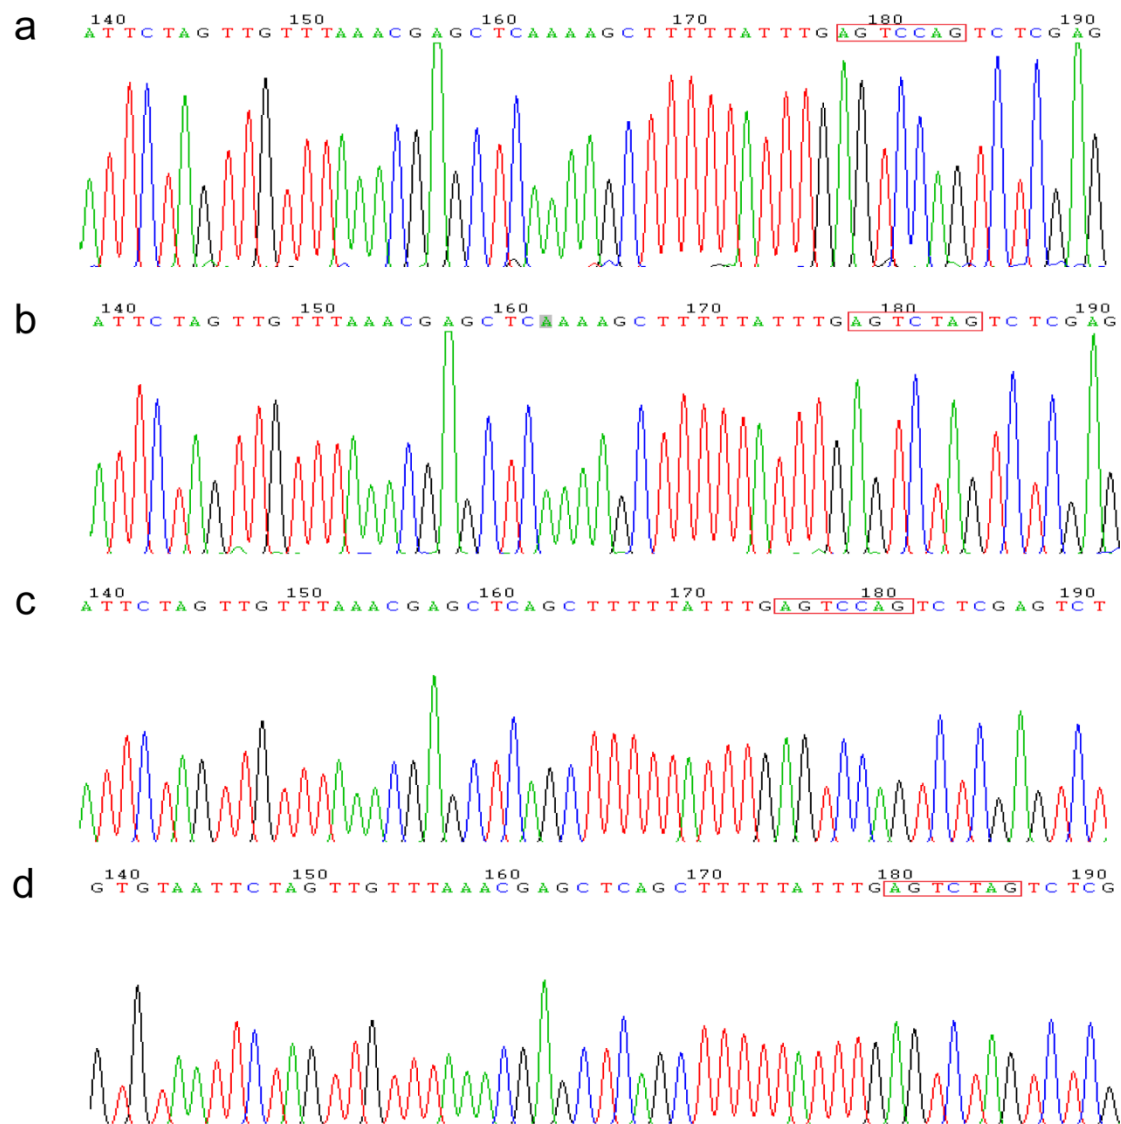

**Fig. S1** Sequencing results for recombinant vectors a: Sequencing results for the rs12607853-378c-C construct. The red square (No. 178-184) AGTCCAG were the hsa-miR-378c binding sequences and the rs12607853 C allele was located at No. 182. b: Sequencing results for the rs12607853-378c-T construct. The red square (No. 178-184) AGTCTAG was the hsa-miR-378c binding sequences and the rs12607853 T allele was located at No. 182. c: Sequencing results for the rs12607853-422a-C construct. The red square (No. 175-181) AGTCCAG were the hsa-miR-422a binding sequences and the rs12607853 C allele was located at No. 179. d: Sequencing results for the rs12607853-422a-T construct. The red square (No. 180-186) AGTCTAG were

the hsa-miR-422a binding sequences and the rs12607853 T allele was located at No. 184.

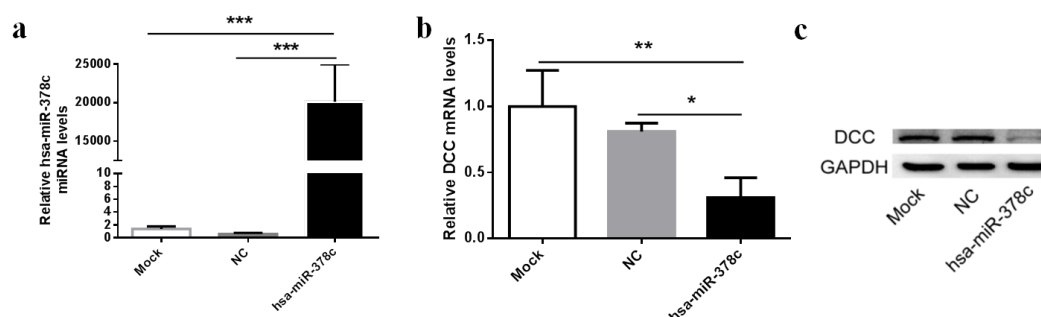

**Fig. S2** DCC expression was inhibited by hsa-miR-378c. a-c : The relative expression of hsa-miR-378c , DCC mRNA and protein in SH-SY5Y cells after transfection with hsa-miR-378c or NC. Data were obtained from three independent experiments.\* indicates  $P<0.05$ , \*\* indicates  $P<0.01$  and \*\*\* indicates  $P<0.001$  (one-way ANOVA). The data of a-c were presented as the mean  $\pm$ Standard Deviation (SD).

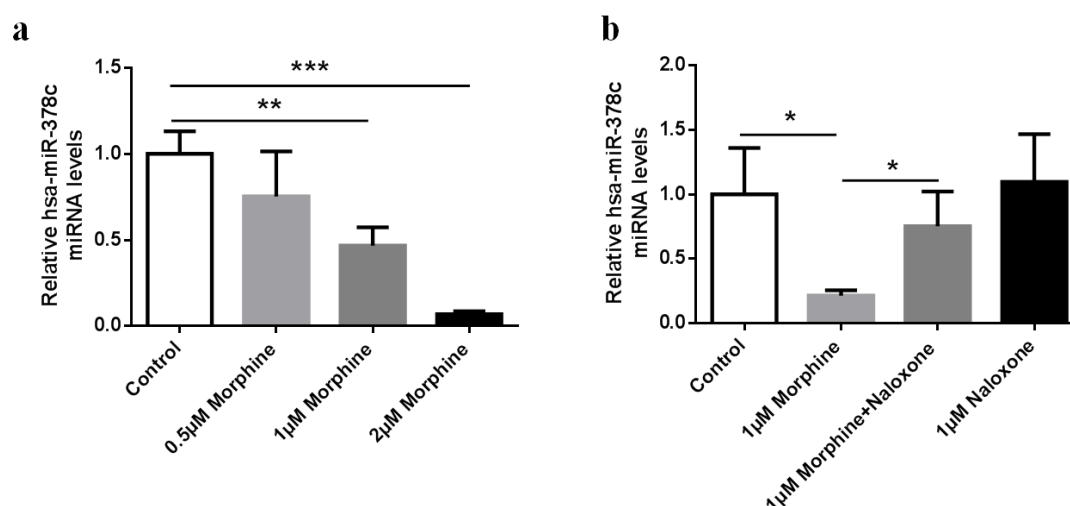

**Fig. S3** Morphine altered hsa-miR-378c and DCC mRNA expression, and naloxone reversed the expression changes of hsa-miR-378c. a: The results obtained when hsa-miR-378c was incubated with different concentrations of morphine (0.5–2  $\mu$ M). b:

The results obtained when hsa-miR-378c was incubated with 1  $\mu$ M morphine and 1 $\mu$ M naloxone. Data were obtained from three independent experiments. \* indicates  $P<0.05$ , \*\* indicates  $P<0.01$ , \*\*\* indicates  $P<0.001$ . a and c were analysed by one-way ANOVA, b and d were analysed by Student's t-test. The data of a-d were presented as the mean  $\pm$ Standard Deviation (SD).
